# Supplementary material for: Expected and unexpected evolution of plant RNA editing factors CLB19, CRR28 and RARE1: retention of CLB19 despite a phylogenetically deep loss of its two known editing targets in Poaceae
Source: PubMed Central journal article supplement (PMC5992886; doi:10.1186/s12862-018-1203-4), 2018-06-07

Additional File 3

CLB19 phylogeny

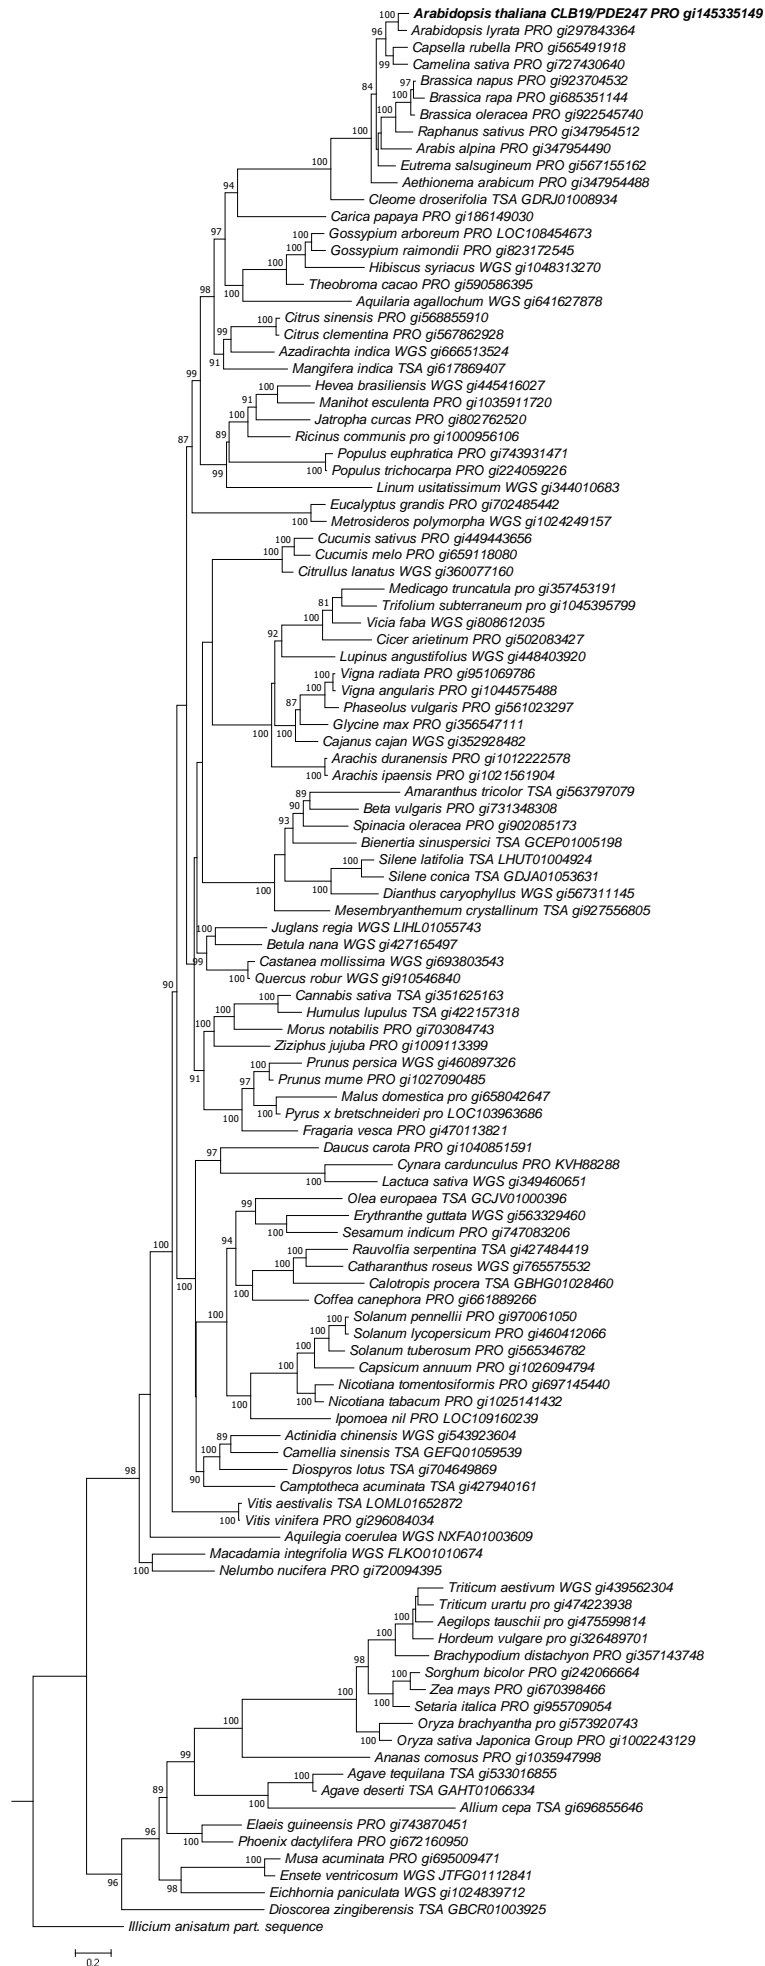

Supplement: 12862_2018_1203_MOESM3_ESM.pdf [file 12862_2018_1203_MOESM3_ESM.pdf]
