# Supplementary material for: Expected and unexpected evolution of plant RNA editing factors CLB19, CRR28 and RARE1: retention of CLB19 despite a phylogenetically deep loss of its two known editing targets in Poaceae
Source: PubMed Central journal article supplement (PMC5992886; doi:10.1186/s12862-018-1203-4), 2018-06-07
Supplement: 12862_2018_1203_MOESM4_ESM.pdf [file 12862_2018_1203_MOESM4_ESM.pdf]

|                                 | accDeU794SL | ndhBeU467PL | ndhDeU878SL | clpPeU559HY | rpoAeU2005F | ndhAeU476SL | References          |
|---------------------------------|-------------|-------------|-------------|-------------|-------------|-------------|---------------------|
| <i>Arabidopsis thaliana</i>     | ed          | ed          | ed          | ed          | ed          | p           | [42]                |
| <i>Arabidopsis lyrata</i>       | ed          | C           | ed          | ed          | C           | p           | [52]                |
| <i>Capsella bursa-pastoris</i>  | C           | ed          | C           | ed          | ed          | p           | [37], this work     |
| <i>Eutrema salsugineum</i>      | C           | C           | ed          | C           | C           | p           | this work           |
| <i>Brassica rapa/oleracea</i>   | C           | C           | C           | ed          | ed          | p           | [37]                |
| <i>Raphanus sativus</i>         | C           | C           | C           | ed          | ed          | p           | [37]                |
| <i>Arabis hirsuta</i>           | C           | C           | C           | ed          | ed          | p           | [37]                |
| <i>Aethionema</i>               | C           | C           | C           | ed          | ed          | p           | [37]                |
| <i>Citrus sinensis</i>          | p           | ed          | ed          | ed          | ed          | p           | this work           |
| <i>Gossypium hirsutum</i>       | ed          | ed          | ed          | ed          | C           | p           | [42]                |
| <i>Hibiscus syriacus</i>        | C           | C           | C           | C           | ed          | p           | OneKP data          |
| <i>Cucumis sativus</i>          | p           | ed          | ed          | ed          | ed          | p           | [17, 42], this work |
| <i>Betula nana</i>              | ed          | ed          | ed          | ed          | ed          | p           | this work           |
| <i>Vigna radiata</i>            | ed          | p           | ed          | ed          | ed          | p           | [42]                |
| <i>Phaseolus vulgaris</i>       | C           | p           | ed          | C           | C           | p           | [52], this work     |
| <i>Vigna angularis</i>          | C           | p           | ed          | C           | C           | p           | this work           |
| <i>Glycine max</i>              | ed          | p           | ed          | ed          | ed          | p           | [51], this work     |
| <i>Cajanus cajan</i>            | C           | p           | ed          | C           | C           | p           | this work           |
| <i>Vicia faba</i>               | C           | p           | ed          | p           | C           | p           | this work           |
| <i>Arachis</i>                  | C           | ed          | ed          | C           | C           | p           | this work           |
| <i>Lupinus angustifolius</i>    | p           | ed          | ed          | ed          | ed          | p           | this work           |
| <i>Hevea brasiliensis</i>       | p           | ed          | ed          | ed          | ed          | p           | [42]                |
| <i>Vitis vinifera</i>           | C           | ed          | C           | C           | C           | p           | this work           |
| <i>Solanum lycopersicum</i>     | p           | ed          | ed          | p           | ed          | p           | this work           |
| <i>Nicotiana tabacum</i>        | p           | ed          | p           | p           | ed          | p           | [42],[52]           |
| <i>Daucus carota</i>            | C           | ed          | C           | p           | C           | p           | this work           |
| <i>Beta vulgaris</i>            | C           | ed          | ed          | ed          | ed          | p           | this work           |
| <i>Nelumbo nucifera</i>         | ed          | ed          | C           | ed          | ed          | C           | this work           |
| <i>Hordeum vulgare</i>          | -           | ed          | ed          | p           | p           | ed          | [52]                |
| <i>Oryza sativa</i>             | -           | ed          | ed          | p           | p           | ed          | [42]                |
| <i>Zea mays</i>                 | -           | ed          | ed          | p           | p           | ed          | [42],[52]           |
| <i>Aegilops tauschii</i>        | -           | ed          | ed          | p           | p           | ed          | [42]                |
| <i>Ananas comosus</i>           | C           | ed          | C           | ed          | ed          | p           | this work           |
| <i>Allium cepa</i>              | p           | ed          | ed          | C           | ed          | C           | this work           |
| <i>Dioscorea zingiberiensis</i> | C           | ed          | ed          | ed          | ed          | C           | this work           |
| <i>Spirodela polyrhiza</i>      | p           | ed          | ed          | p           | 0-8%        | ed          | [42], this work     |
| <i>Illicium oligandrum</i>      | ed          | ed          | ed          | ed          | ed          | ed          | this work           |
| <i>Nuphar advena</i>            | p           | C           | ed          | C           | ed          | C           | this work           |
| <i>Calycanthus floridus</i>     | C           | C           | ed          | C           | ed          | C           | this work           |
| <i>Chloranthus spicatus</i>     | ed          | ed          | ed          | ed          | p           | C           | this work           |
| <i>Liriodendron tulipifera</i>  |             | C           | ed          | C           | C           | C           | this work           |
| <i>Magnolia kwangsiensis</i>    | C           | ed          | ed          | ed          | ed          | C           | this work           |
| <i>Amborella trichopoda</i>     | ed          | ed          | ed          | ed          | ed          | ed          | [17]                |

**Legend: rence numbering as in manuscript:**

|                        |    |                     |
|------------------------|----|---------------------|
| editing confirmed      | ed | [42]: et al 2018    |
| C in DNA, ed predicted | C  | [17] et al 2016     |
| editing not confirmed  | C  | [52]lice et al 2018 |
| "pre-edited", T in DNA | p  | [37]s et al 2012    |
|                        |    | [51]es et al 2017   |
